# Supplementary material for: Correlation between PIK3CA mutations in cell-free DNA and everolimus efficacy in HR+, HER2− advanced breast cancer: results from BOLERO-2
Source: PubMed Central journal article supplement — Br J Cancer. 2017 Feb 9;116(6):726–30. doi: 10.1038/bjc.2017.25 (PMC5355930; doi:10.1038/bjc.2017.25), 2017-02-09
Supplement: bjc201725x1.pdf [file bjc201725x1.pdf]

## SUPPLEMENTARY MATERIAL

### SUPPLEMENTARY METHODS

**Statistical analysis.** For concordance calculation, samples carrying the 3 hotspot mutations in paired tumor-cfDNA from the same patients were designated as concordant. Tumor samples with mutations other than the 3 hotspot mutations tested in the ctDNA were designated as wild-type for concordance calculation purpose.

**Supplementary Table 1. Baseline characteristics and clinical outcomes in cfDNA and overall population in BOLERO-2**

| Characteristic                                   | cfDNA population     |                      | Overall study population |                      |
|--------------------------------------------------|----------------------|----------------------|--------------------------|----------------------|
|                                                  | EVE + EXE<br>(n=357) | PBO + EXE<br>(n=193) | EVE + EXE<br>(n=485)     | PBO + EXE<br>(n=239) |
| Age, years (range)                               | 61 (54-68)           | 60 (54-66)           | 62 (56-69)               | 61 (55-66)           |
| Race, n (%)                                      |                      |                      |                          |                      |
| White                                            | 274 (77)             | 151 (78)             | 361 (74)                 | 186 (78)             |
| Asian                                            | 66 (18)              | 37 (19)              | 98 (20)                  | 45 (19)              |
| Other                                            | 17 (05)              | 5 (03)               | 26 (6)                   | 8 (3)                |
| ECOG performance status, n (%)                   |                      |                      |                          |                      |
| 0                                                | 203 (57)             | 114 (59)             | 292 (60)                 | 142 (59)             |
| 1                                                | 140 (39)             | 70 (36)              | 175 (36)                 | 84 (35)              |
| 2                                                | 7 (2)                | 4 (2)                | 9 (2)                    | 7 (3)                |
| Visceral disease, n (%)                          | 198 (55)             | 108 (56)             | 271 (56)                 | 135 (56)             |
| Number of metastatic sites, n (%)                |                      |                      |                          |                      |
| 1                                                | 106 (30)             | 47 (24)              | 154 (32)                 | 64 (27)              |
| 2                                                | 116 (32)             | 77 (40)              | 149 (31)                 | 84 (35)              |
| ≥3                                               | 134 (38)             | 69 (36)              | 180 (37)                 | 91 (38)              |
| Previous sensitivity to endocrine therapy, n (%) | 300 (84)             | 161 (83)             | 409 (84)                 | 201 (84)             |
| Previous endocrine treatment, n (%)              |                      |                      |                          |                      |
| Letrozole or anastrozole                         | 357 (100)            | 193 (100)            | 485 (100)                | 239 (100)            |
| Tamoxifen                                        | 167 (47)             | 97 (50)              | 230 (47)                 | 119 (50)             |
| Fulvestrant                                      | 60 (17)              | 30 (16)              | 80 (17)                  | 39 (16)              |
| PFS events                                       | 255                  | 171                  | 310                      | 200                  |
| Median PFS, months (95% CI)                      | 6.97<br>(6.77-8.34)  | 2.83<br>(2.76-4.07)  | 7.82<br>(6.93-8.48)      | 3.19<br>(2.76-4.14)  |
| Hazard ratio (95% CI)                            | 0.43 (0.35-0.52)     |                      | 0.45 (0.37-0.54)         |                      |

cfDNA = cell-free DNA; CI = confidence interval; ECOG = Eastern Cooperative Oncology Group; EVE = everolimus; EXE = exemestane; PFS = progression-free survival.

**Supplementary Table 2. Exploratory analysis of *PIK3CA* by mutation-site in the placebo arm**

| Group              | N   | PFS Events | Median PFS (95% CI) | Hazard ratio (95% CI) | OS Events | Median OS (95% CI)     | Hazard ratio (95% CI) |
|--------------------|-----|------------|---------------------|-----------------------|-----------|------------------------|-----------------------|
| WT                 | 124 | 111        | 2.96<br>(2.76-4.17) |                       | 70        | 29.67<br>(21.91-40.25) |                       |
| MT                 | 69  | 60         | 2.69<br>(1.51-4.11) | 1.26<br>(1.01-1.58)   | 49        | 22.70<br>(15.41-32.10) | 1.32<br>(1.02-1.71)   |
| <i>H1047R</i>      | 43  | 38         | 4.04<br>(1.51-4.7)  | 1.15<br>(0.88-1.49)   | 28        | 28.48<br>(19.91-35.61) | 1.13<br>(0.83-1.55)   |
| <i>E545K/E542K</i> | 26  | 22         | 2.22<br>(1.38-2.76) | 1.56<br>(1.12-2.18)   | 21        | 13.77<br>(10.22-29.31) | 1.72<br>(1.22-2.43)   |

CI = confidence interval; MT = mutant; OS = overall survival; PFS = progression-free survival; WT = wild-type.

**Supplementary Table 3. Multivariate analysis adjusting for sensitivity to prior hormonal therapy, visceral disease and ECOG status**

| <i>PIK3CA</i> status | Treatment | N   | PFS Events | Median PFS (95% CI) | Adjusted hazard ratio (95% CI) |
|----------------------|-----------|-----|------------|---------------------|--------------------------------|
| WT                   | PBO + EXE | 124 | 111        | 2.96 (2.76 - 4.17)  | 0.39 (0.3 - 0.51)              |
|                      | EVE + EXE | 188 | 132        | 7.36 (6.77 - 9.69)  |                                |
| MT                   | PBO + EXE | 69  | 60         | 2.69 (1.51 - 4.11)  | 0.35 (0.25 - 0.49)             |
|                      | EVE + EXE | 169 | 123        | 6.9 (5.55 - 8.31)   |                                |

CI = confidence interval; EVE = everolimus; EXE = exemestane; MT = mutant; PBO = placebo; PFS = progression-free survival; WT = wild-type.

**Supplementary Figure 1. Comparison of cfDNA *PIK3CA* mutant allele fractional abundance in tumor-cfDNA paired samples by mutation concordance**

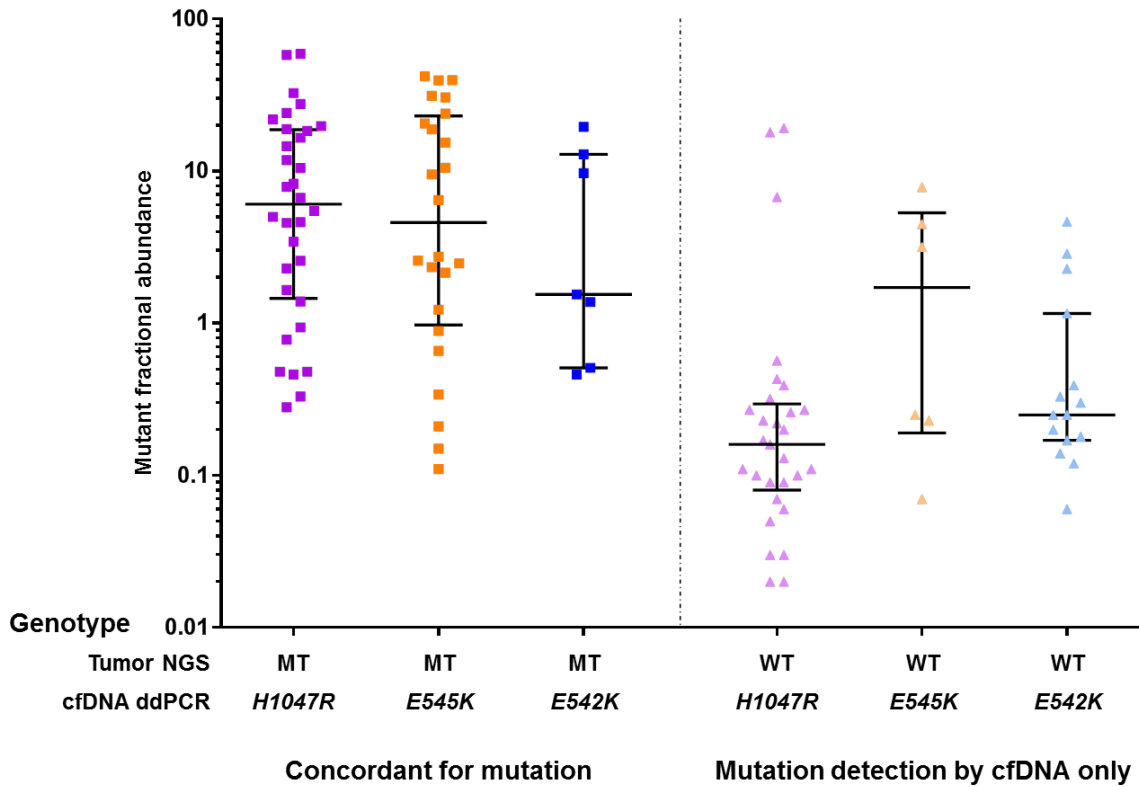

Filled shapes represent the baseline cfDNA mutant allele fractional abundance for each patient separated by mutation site and tumor NGS genotype. A dotted line separates the samples that were concordant for both tumor NGS and cfDNA ddPCR *PIK3CA* genotype and those that were discordant with *PIK3CA* mutation identified by cfDNA ddPCR only. The y-axis is a logarithmic scale. Error bars depict median with interquartile range. cfDNA = cell free DNA; ddPCR = droplet digital PCR; NGS = next-generation sequencing; MT = mutant; WT = wild-type.
